# Supplementary material
Source: PubMed Central journal article supplement (PMC4404295)

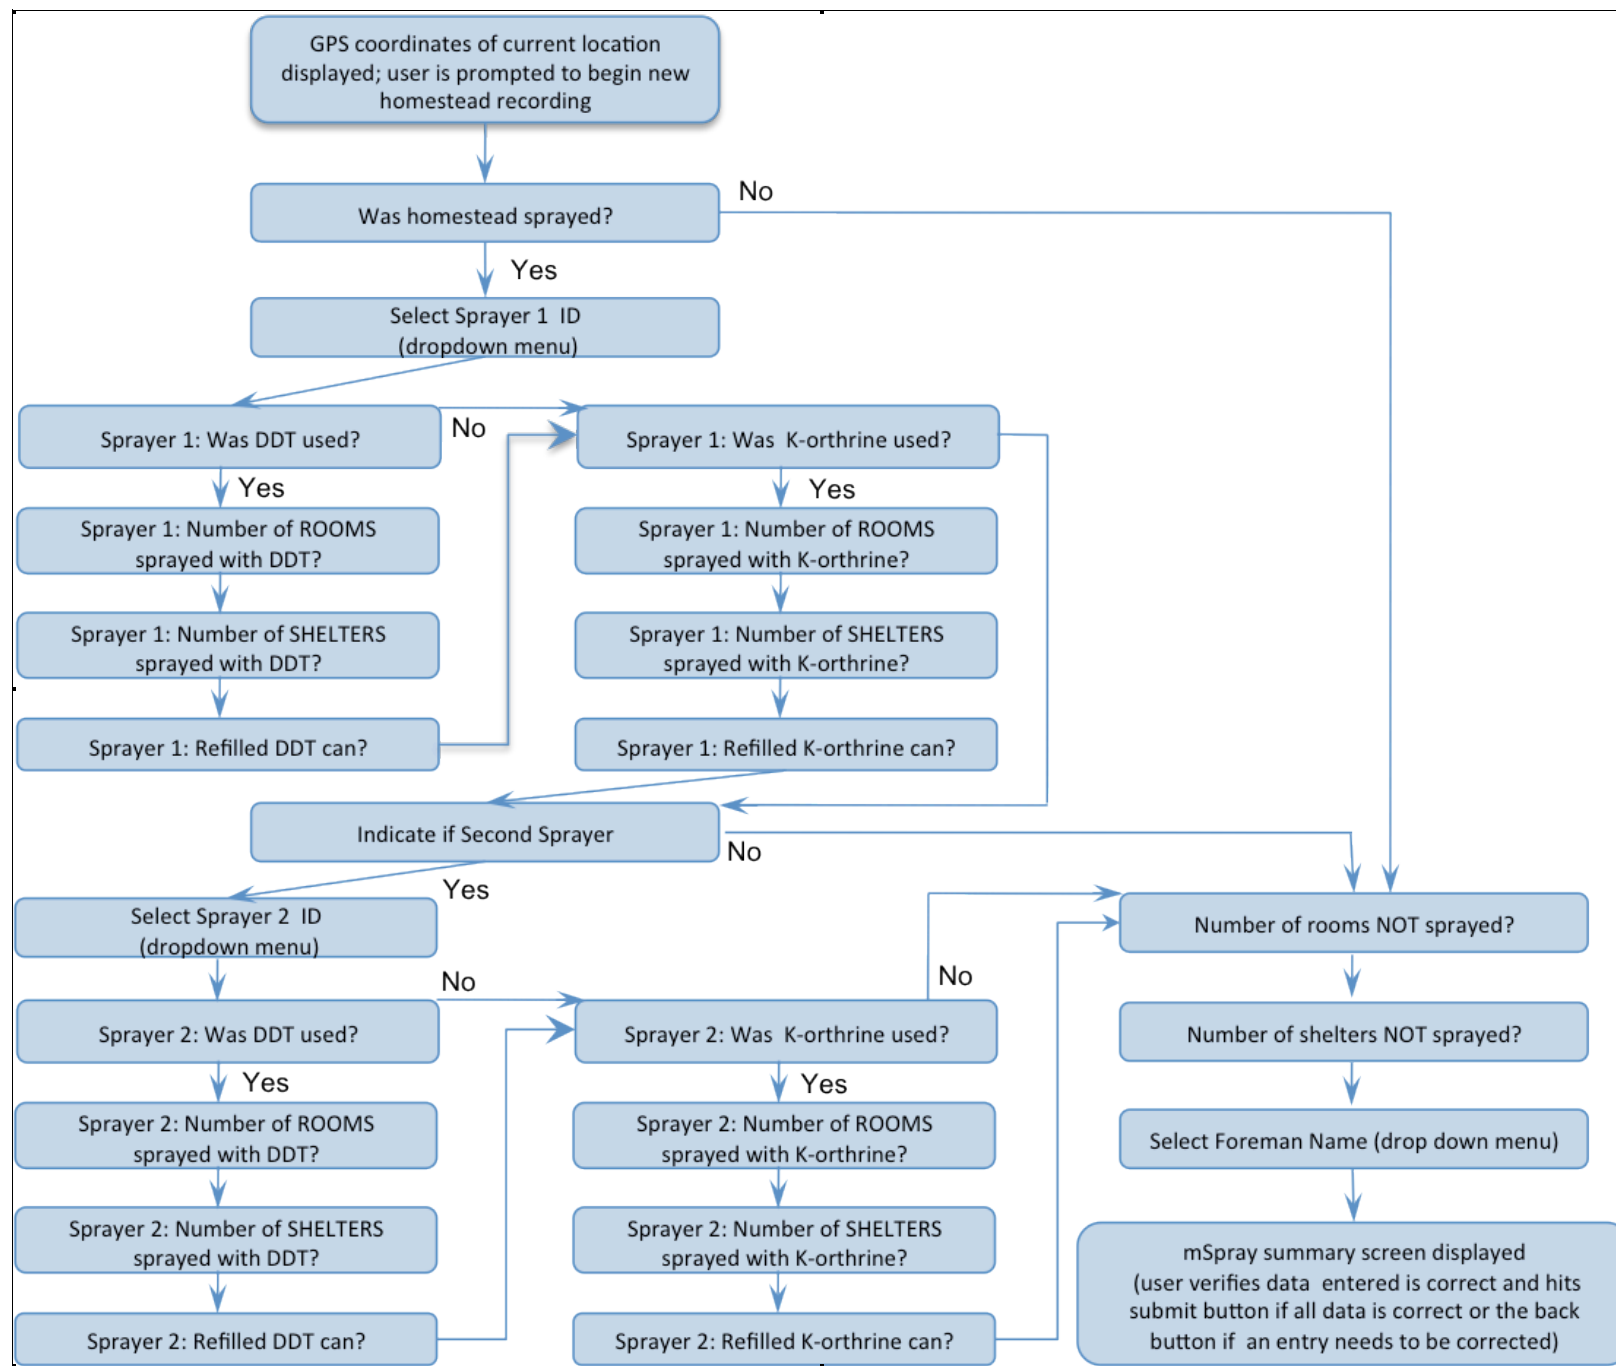

**Supplemental Material, Figure 1.** Flow diagram of questions in the mSpray app.

Supplement: NIHMS679592-supplement-supplement_1.pdf [file NIHMS679592-supplement-supplement_1.pdf]
